# Supplementary material
Source: MDPI journal article supplement (https://www.mdpi.com/2076-3417/9/10/1997)
Supplement: s1 [file s1]

Experiments described in section 6.2:

https://drive.google.com/file/d/1Edzpnic6liUU24Carne1NaFroRAObDFj/view?usp=sharing

Experiments described in section 6.3.2:

https://drive.google.com/file/d/1k8-rPsVJxhozEqVWt5Cf0BxxuOHRC0aU/view?usp=sharing
